# Supplementary material for: Design and implementation of an infrared artificial visual neural synapse based on a p-WSe2/n-Ta2NiS5 van der Waals heterojunction
Source: Royal Society of Chemistry journal article supplement (doi:10.1039/d4tc02854f), 2024-01-01
Supplement: d4tc02854f1.pdf [file d4tc02854f1.pdf]

Supporting Information

**Design and Implementation of an Infrared Artificial Visual Neural Synapse  
Based on p-WSe<sub>2</sub>/n-Ta<sub>2</sub>NiS<sub>5</sub> van der Waals Heterojunction**

Pengfei Hou,<sup>\*a</sup> Shiwen Tan<sup>a</sup> and Shuaizhi Zheng<sup>\*a</sup>

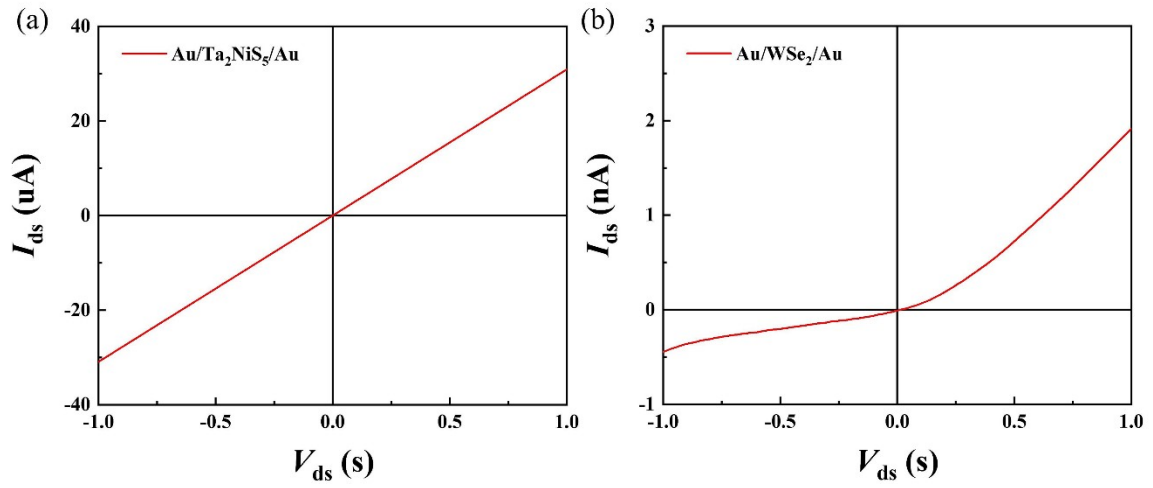

**Figure S1.** The linear and nonlinear current–voltage characteristics of transistors. (a) Au/Ta<sub>2</sub>NiS<sub>5</sub>/Au transistor. (b) Au/WSe<sub>2</sub>/Au transistor.

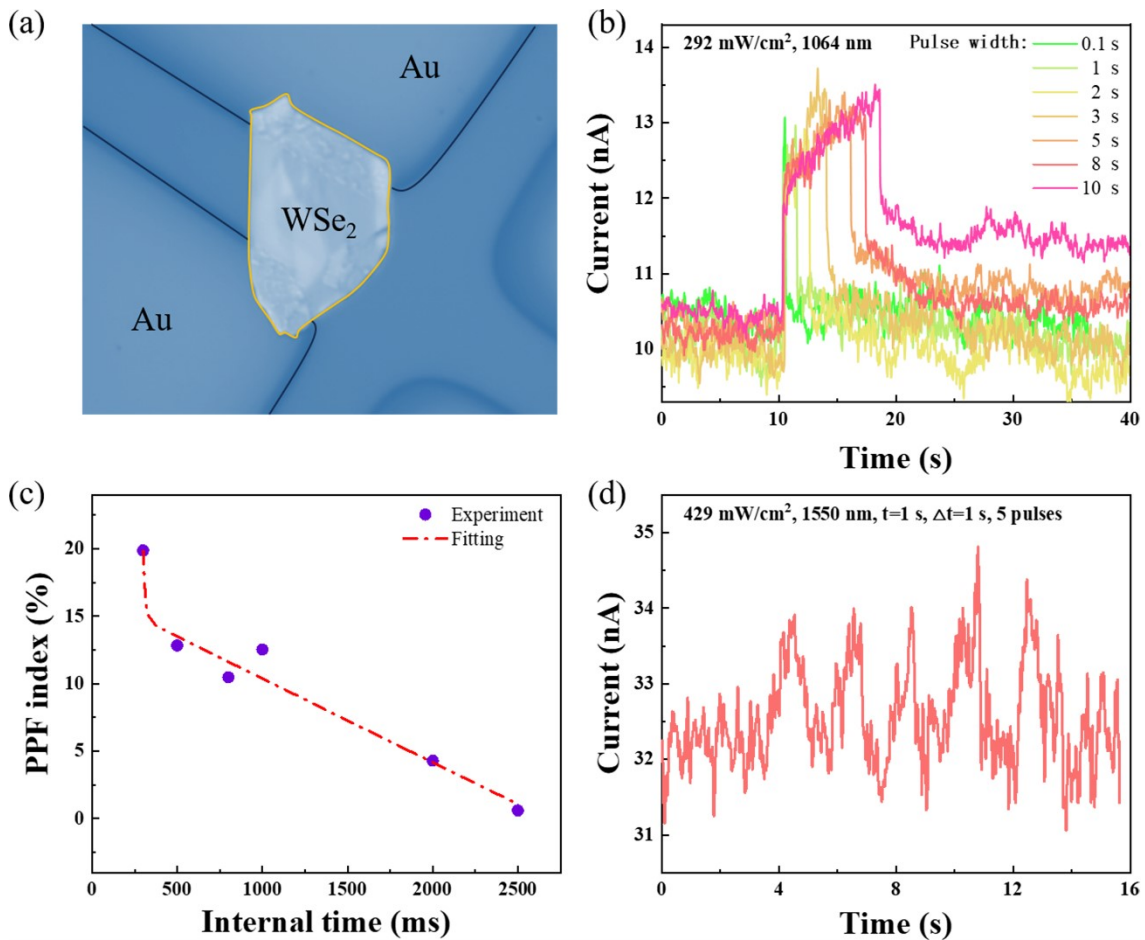

**Figure S2.** The optical microscope image of the Au/WSe<sub>2</sub>/Au device. (b) The photoresponse to single light pulse (1064 nm, 292 mW/cm<sup>2</sup>, -1 V) with different irradiation time. (c) The change of PPF as a function of  $\Delta t$  (1064 nm, 292 mW/cm<sup>2</sup>, -1 V). (d) The photoresponse of five light pulses under 1550 nm (429 mW/cm<sup>2</sup>, -1 V).

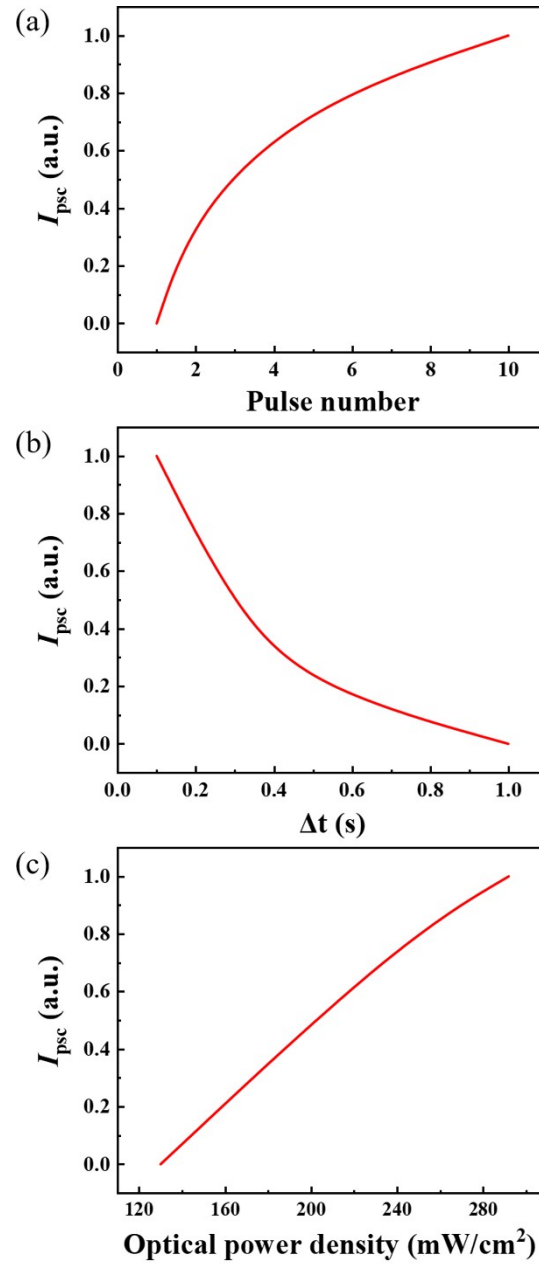

**Figure S3.** The influence of different light pulse variables on synaptic weights. (a) Pulse number dependent plasticity. (b) Pulse frequency dependent plasticity. (c) Pulse density dependent plasticity. The curves are the result of the fits.

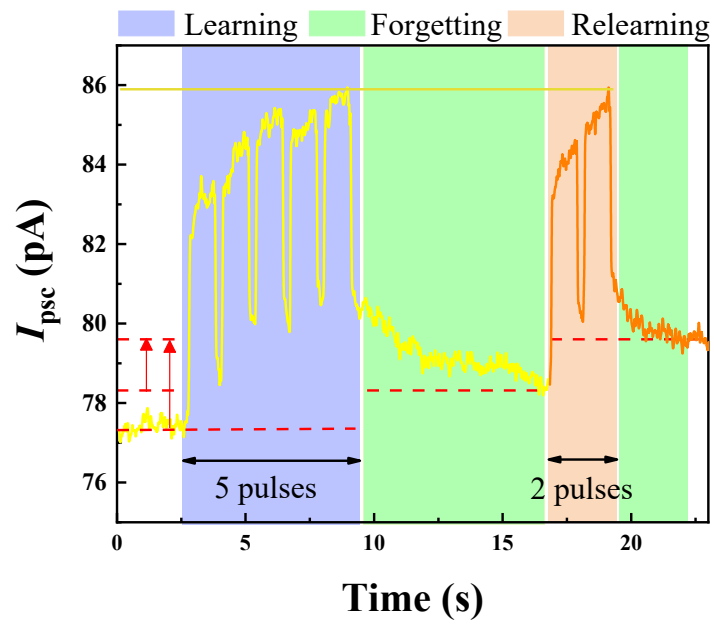

**Figure S4.** Simulation of learning-forgetting behavior in p-WSe<sub>2</sub>/n-Ta<sub>2</sub>NiS<sub>5</sub> heterojunction.
